# Supplementary material
Source: publisher site journal article supplement (https://www.dovepress.com/article/571149)
Supplement: Supplementary file 1 [file 571149%20Supplementary%20Material.docx]

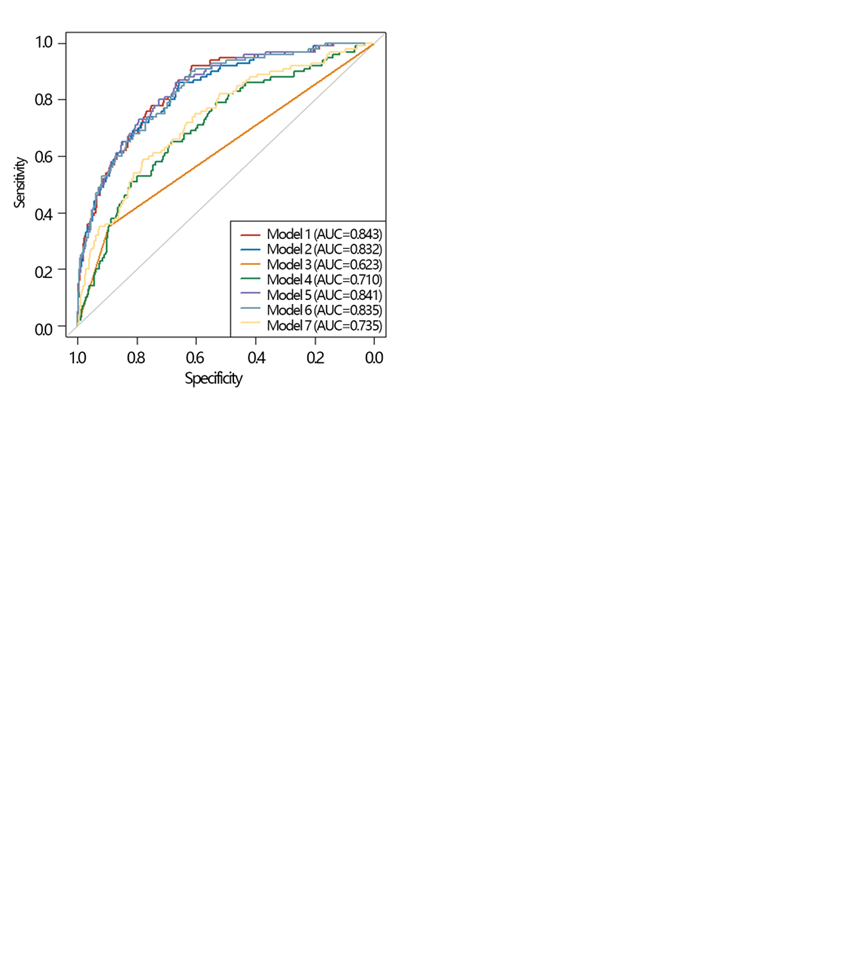


**Supplementary Figure 1 ROC analysis of different models in the train set**

Note: Model 1: age + weight + height +OP history of self-report + HGB + HDL-C

Model 2: age + weight + height

Model 3: OP history of self-report

Model 4: HGB+HDL-C

Model 5: age + weight + height + OP history of self-report

Model 6: age + weight + height + HGB + HDL-C

Model 7: OP history of self-report + HGB + HDL-C

Abbreviation: HGB: hemoglobin, HDL-C: high-density lipoprotein cholesterol, OP: osteoporosis, ROC: receiver operating characteristic curve, AUC: area under the curve

| **Supplementary Table 1 Missing variable statistics** | | |
| --- | --- | --- |
| Variables | Missing Count | Missing Percent |
| Gender | 0 | 0.00 |
| Age | 0 | 0.00 |
| Race | 0 | 0.00 |
| Education level | 2 | 0.15 |
| Marital status | 2 | 0.15 |
| Smoking | 1 | 0.07 |
| Drinking | 0 | 0.00 |
| HEI-2015 | 177 | 13.1 |
| PA | 270 | 19.99 |
| Sleep duration | 0 | 0.00 |
| Arthritis | 3 | 0.22 |
| PIR | 98 | 7.25 |
| BMI | 8 | 0.59 |
| Weight | 6 | 0.44 |
| Height | 7 | 0.52 |
| WC | 18 | 1.33 |
| diabetes | 0 | 0.00 |
| Hypertension | 0 | 0.00 |
| Cancer | 0 | 0.00 |
| Glucocorticosteroid | 251 | 18.58 |
| Milk | 4 | 0.30 |
| OP history of self-report | 5 | 0.37 |
| OP of parents | 89 | 6.59 |
| Fracture history | 0 | 0.00 |
| ALB | 68 | 5.03 |
| ALP | 68 | 5.03 |
| BUN | 68 | 5.03 |
| Calcium | 69 | 5.11 |
| TC | 68 | 5.03 |
| CR | 68 | 5.03 |
| GGT | 68 | 5.03 |
| FPG | 68 | 5.03 |
| Phosphorus | 68 | 5.03 |
| TB | 68 | 5.03 |
| TG | 68 | 5.03 |
| UA | 68 | 5.03 |
| Sodium | 68 | 5.03 |
| Potassium | 68 | 5.03 |
| Chloride | 68 | 5.03 |
| WBC | 45 | 3.33 |
| LC | 48 | 3.55 |
| MC | 48 | 3.55 |
| NC | 48 | 3.55 |
| RBC | 45 | 3.33 |
| HGB | 45 | 3.33 |
| RDW | 45 | 3.33 |
| PLT | 45 | 3.33 |
| VD | 516 | 38.19 |
| HDL-C | 62 | 4.59 |
| Cadmium | 157 | 11.62 |
| Lead | 157 | 11.62 |
| Mercury | 157 | 11.62 |
| OP | 0 | 0.00 |

Abbreviation: PIR: poverty income ratio, BMI: body mass index, WC: waist circumference, ALB: albumin, ALP: alkaline phosphatase, BUN: blood urea nitrogen, TC: total cholesterol, CR: creatinine, TG: triglyceride, TB: total bilirubin UA: uric acid, LC: lymphocyte count, MC: monocyte count, NC: neutrophils count, RBC: red blood cell count, HGB: Hemoglobin, FPG: fasting plasma glucose, GGT: gamma glutamyl transferase, RDW: red cell distribution width, PLT: platelet count, HDL-C: high-density lipoprotein Cholesterol, HEI-2015: health diet index-2015, PA: physical activity, OP: osteoporosis, VD: Vitamin D, WBC: white blood cell.

| **Supplementary Table 2 Collinearity analysis of variables in the train set** | |
| --- | --- |
| Variables | VIF |
| Gender | 1.750 |
| Age | 1.366 |
| Race | 1.113 |
| Education level | 1.149 |
| Marital status | 1.101 |
| Drinking | 1.107 |
| HEI-2015 | 1.151 |
| PA | 1.086 |
| Sleep duration | 1.076 |
| PIR | 1.170 |
| BMI | 10.111 |
| Weight | 9.771 |
| Height | 5.576 |
| WC | 2.856 |
| diabetes | 1.257 |
| Hypertension | 1.242 |
| Arthritis | 1.055 |
| Cancer | 1.072 |
| Glucocorticosteroid | 1.108 |
| Milk | 1.065 |
| OP history of self-report | 1.152 |
| OP of parents | 1.178 |
| Fracture history | 1.072 |
| ALB | 1.411 |
| ALP | 1.205 |
| BUN | 1.500 |
| Calcium | 1.365 |
| TC | 1.261 |
| CR | 1.307 |
| GGT | 1.206 |
| FPG | 1.201 |
| Phosphorus | 1.177 |
| TB | 1.168 |
| TG | 1.321 |
| UA | 1.233 |
| Sodium | 1.450 |
| Potassium | 1.155 |
| Chloride | 1.461 |
| WBC | 16.002 |
| LC | 8.682 |
| MC | 2.554 |
| NC | 12.045 |
| RBC | 1.832 |
| HGB | 2.044 |
| RDW | 1.355 |
| PLT | 1.191 |
| HDL-C | 1.361 |
| Cadmium | 1.209 |
| Lead | 1.202 |
| Mercury | 1.104 |
| Smoking | 1.188 |

Abbreviation: PIR: poverty income ratio, BMI: body mass index, WC: waist circumference, ALB: albumin, ALP: alkaline phosphatase, BUN: blood urea nitrogen, TC: total cholesterol, CR: creatinine, TG: triglyceride, TB: total bilirubin UA: uric acid, LC: lymphocyte count, MC: monocyte count, NC: neutrophils count, RBC: red blood cell count, HGB: Hemoglobin, FPG: fasting plasma glucose, GGT: gamma glutamyl transferase, RDW: red cell distribution width, PLT: platelet count, HDL-C: high-density lipoprotein Cholesterol, HEI-2015: health diet index-2015, PA: physical activity, WBC: white blood cell. VIF: variance inflation factor.

| **Supplementary Table 3 Collinearity analysis of variables after excluding variables with collinearity in the train set** | |
| --- | --- |
| Variables | VIF |
| Gender | 1.748 |
| Age | 1.365 |
| Race | 1.107 |
| Education level | 1.151 |
| Marital status | 1.099 |
| Drinking | 1.108 |
| HEI-2015 | 1.141 |
| PA | 1.084 |
| Sleep duration | 1.073 |
| PIR | 1.170 |
| Weight | 2.849 |
| Height | 1.738 |
| WC | 2.831 |
| Diabetes | 1.253 |
| Hypertension | 1.240 |
| Arthritis | 1.053 |
| Cancer | 1.072 |
| Glucocorticosteroid | 1.104 |
| Milk | 1.063 |
| OP history of self-report | 1.146 |
| OP of parents | 1.173 |
| Fracture history | 1.072 |
| ALB | 1.405 |
| ALP | 1.203 |
| BUN | 1.494 |
| Calcium | 1.360 |
| TC | 1.259 |
| CR | 1.312 |
| GGT | 1.203 |
| FPG | 1.197 |
| Phosphorus | 1.173 |
| TB | 1.162 |
| TG | 1.326 |
| UA | 1.237 |
| Sodium | 1.448 |
| Potassium | 1.144 |
| Chloride | 1.454 |
| LC | 1.104 |
| MC | 1.150 |
| NC | 1.218 |
| RBC | 1.830 |
| HGB | 2.045 |
| RDW | 1.338 |
| PLT | 1.182 |
| HDL-C | 1.366 |
| Cadmium | 1.208 |
| Lead | 1.199 |
| Mercury | 1.101 |
| Smoking | 1.183 |

Abbreviation: PIR: poverty income ratio, WC: waist circumference, ALB: albumin, ALP: alkaline phosphatase, BUN: blood urea nitrogen, TC: total cholesterol, CR: creatinine, TG: triglyceride, TB: total bilirubin UA: uric acid, LC: lymphocyte count, MC: monocyte count, NC: neutrophils count, RBC: red blood cell count, HGB: Hemoglobin, FPG: fasting plasma glucose, GGT: gamma glutamyl transferase, RDW: red cell distribution width, PLT: platelet count, HDL-C: high-density lipoprotein Cholesterol, HEI-2015: health diet index-2015, PA: physical activity, VIF: variance inflation factor.

**Supplementary file 1**

**Supplementary specification about laboratory indicators**

Among laboratory indicators, albumin (ALB, g/dL), alkaline phosphatase (ALP, U/L), blood urea nitrogen (BUN, mg/dL), calcium (mg/dL), creatinine (CR, mg/dL), phosphorus (mmol/L), total bilirubin (TB, mg/dL), triglyceride (TG, mg/dL), uric acid (UA, mg/dL), sodium (mmol/L), potassium (mmol/L), chloride (mmol/L), fasting plasma glucose (FPG, g/dL), and gamma glutamyl transferase (GGT, U/L) were collected from “Standard Biochemistry Profile” in NHANES. The detailed protocol for their detection method is described in https://wwwn.cdc.gov/Nchs/Data/Nhanes/Public/2007/DataFiles/BIOPRO_E.htm#Component_Description.

Among laboratory indicators, high-density lipoprotein cholesterol (HDL-C, mmol/L) and total cholesterol (TC, mg/dL) were collected from “Cholesterol – HDL” and “Cholesterol – Total” profiles, respectively, in NHANES. The detailed protocol for their detection method is described in

https://wwwn.cdc.gov/Nchs/Data/Nhanes/Public/2007/DataFiles/HDL_E.htm#LBDHDD and

https://wwwn.cdc.gov/Nchs/Data/Nhanes/Public/2007/DataFiles/TCHOL_E.htm#LBXTC, respectively.

Among laboratory indicators, white blood cell (WBC, 1000 cells/μL), lymphocyte count (LC, 1000 cells/μL), monocyte count (MC, 1000 cells/μL), neutrophils count (NC, 1000 cells/μL), red blood cell count, (RBC, million cells/μL), hemoglobin (HGB, g/dL), red cell distribution width (RDW, %), and platelet count (PLT, 1000 cells/μL) were collected from “Complete Blood Count with 5-Part Differential” in NHANES. The detailed protocol for their detection method is described in https://wwwn.cdc.gov/Nchs/Data/Nhanes/Public/2005/DataFiles/CBC_D.htm#LBXWBCSI.

Among laboratory indicators, mercury (nmol/L), cadmium (nmol/L), and lead (nmol/L) were collected from “Cadmium, Lead, & Total Mercury – Blood” profile. The detailed protocol for their detection method is described in https://wwwn.cdc.gov/Nchs/Data/Nhanes/Public/2005/DataFiles/PBCD_D.htm#LBDTHGSI.
